- Force on perioperative blindness. *ANESTHESIOLOGY* 2006; 104:1319–28
4. The Postoperative Visual Loss Study Group: Risk factors associated with ischemic optic neuropathy after spinal fusion surgery. *ANESTHESIOLOGY* 2012; 116:15–24
  5. American Society of Anesthesiologists: Practice Advisory for perioperative visual loss associated with spine surgery: An updated report by the American Society of Anesthesiologists Task Force on perioperative visual loss. *ANESTHESIOLOGY* 2012; 116:274–85
  6. Rubin DS, Parakati I, Lee LA, Moss HE, Joslin CE, Roth S: Perioperative visual loss in spine fusion surgery: Ischemic optic neuropathy in the United States from 1999 to 2011 in the Nationwide Inpatient Sample. *ANESTHESIOLOGY* 2016; 125:457–64
  7. Banczerowski P, Czegléczki G, Papp Z, Veres R, Rappaport HZ, Vajda J: Minimally invasive spine surgery: Systematic review. *Neurosurg Rev* 2015; 38:11–26; discussion 26
  8. Phan K, Rao PJ, Kam AC, Mobbs RJ: Minimally invasive *versus* open transforaminal lumbar interbody fusion for treatment of degenerative lumbar disease: Systematic review and meta-analysis. *Eur Spine J* 2015; 24:1017–30
  9. Wang M, Zheng XF, Jiang LS: Efficacy and safety of antifibrinolytic agents in reducing perioperative blood loss and transfusion requirements in scoliosis surgery: A systematic review and meta-analysis. *PLoS One* 2015; 10:e0137886
  10. Cheriyan T, Maier SP II, Bianco K, Slobodyanyuk K, Rattenni RN, Lafage V, Schwab FJ, Lonner BS, Errico TJ: Efficacy of tranexamic acid on surgical bleeding in spine surgery: A meta-analysis. *Spine J* 2015; 15:752–61

## ANESTHESIOLOGY REFLECTIONS FROM THE WOOD LIBRARY-MUSEUM

### From Chloroform to Urania, Liebig's Muse of Astronomy

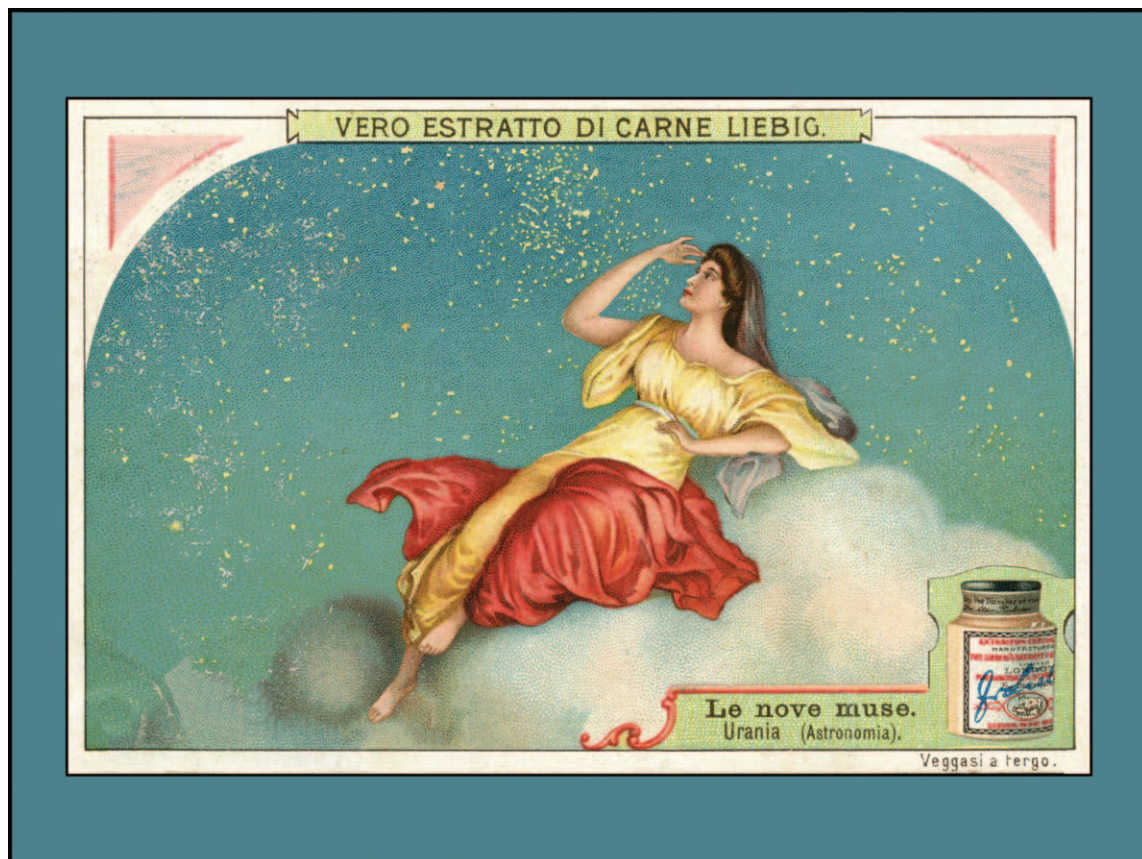

In Greek mythology, Zeus bedded the Titaness of Memory (Mnemosyne), and she conceived nine daughters, the Muses. Each Muse advanced her respective art by (1) prompting humans' memorization of her art and (2) inspiring memorable, original art for future generations. Memory, the daughter of Sky (Ouranos or Uranus), gave birth to Urania, the Muse of Astronomy (*above*), who graces this Italian card advertising a company cofounded by chloroform pioneer Justus von Liebig (1803 to 1873). Astronomy ("star arranging") for many ancients reflected or foretold efforts by divinities. For example, Homer's account of Odysseus' rescue from Calypso's island by Hermes, the speediest god, might have been reflected in the *Odyssey* by the astronomical path of Mercury, the speediest planet. (Copyright © the American Society of Anesthesiologists' Wood Library-Museum of Anesthesiology.)

George S. Bause, M.D., M.P.H., Honorary Curator, ASA's Wood Library-Museum of Anesthesiology, Schaumburg, Illinois, and Clinical Associate Professor, Case Western Reserve University, Cleveland, Ohio. UJYC@aol.com.
